# Supplementary material for: Modeled source apportionment of black carbon particles coated with a light-scattering shell
Source: Copernicus journal article supplement (doi:10.5194/amt-14-3707-2021), 2021-05-21
Supplement: Supplementary file 1 [file amt-14-3707-2021-supplement.pdf]

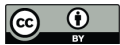

*Supplement of*

## **Modeled source apportionment of black carbon particles coated with a light-scattering shell**

**Aki Virkkula**

*Correspondence to:* Aki Virkkula ([aki.virkkula@fmi.fi](mailto:aki.virkkula@fmi.fi))

The copyright of individual parts of the supplement might differ from the article licence.

**Supplement:**

**Comparison of absorption Ångström exponents of the wavelength pairs 470/950 and 440/700**

Absorption coefficients at  $\lambda = 440 \text{ nm}$ ,  $470 \text{ nm}$ ,  $870 \text{ nm}$  and  $950 \text{ nm}$  were calculated for spherical BC particles coated with an ammonium sulfate shell. The particle size distributions were unimodal with the geometric mean diameter  $D_g$  range of  $50 - 500 \text{ nm}$ , geometric standard deviations  $\sigma_g$  of  $1.4$ ,  $1.6$  and  $1.8$  and size-independent shell volume fraction  $f_s$  ranging from  $0$  to  $99\%$ . Absorption Ångström exponents  $\alpha_{\text{abs}}$  were calculated for two wavelength pairs,  $440/870$  and  $470/950$ . See the main text section 2 for details. Fig. S1 presents the scatter plot of these two Ångström exponents, Fig. S2 their size-dependent average differences and Table S1 the statistics of the comparison.

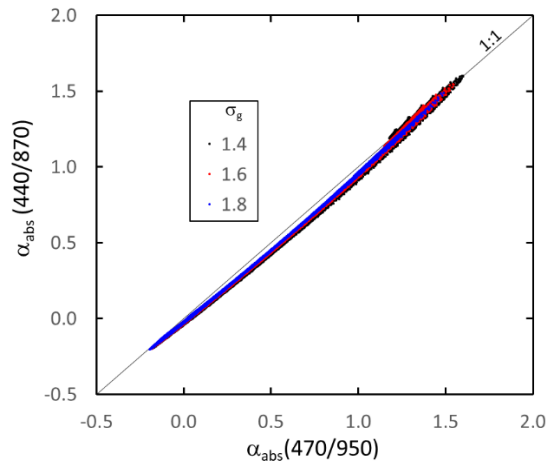

Figure S1.  $\alpha_{\text{abs}}(440/870)$  vs.  $\alpha_{\text{abs}}(470/950)$  for unimodal coated BC-particle size distributions with the  $D_g$  range of  $50 - 500 \text{ nm}$ ,  $f_s$  range  $0 - 99\%$  and  $\sigma_g = 1.4, 1.6$  and  $1.8$ .

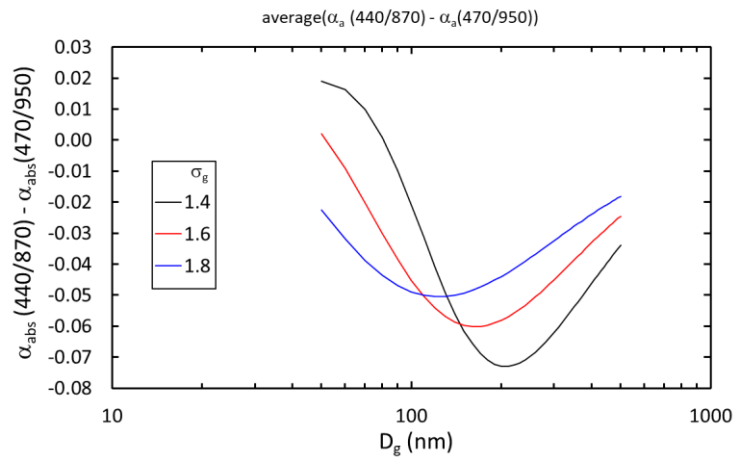

Figure S2. Average difference between  $\alpha_{\text{abs}}(440/870)$  and  $\alpha_{\text{abs}}(470/950)$  as a function of  $D_g$  and  $\sigma_g$  of the size distribution.

Table S1. Statistics of the comparison of  $\alpha_{\text{abs}}(470/950)$  and  $\alpha_{\text{abs}}(440/870)$ .  $\sigma_g$ : geometric standard deviation of the size distributions.  $k$  and  $Y_0$ : slope and offset of the linear regression;  $se$ : standard error of the respective coefficient; for the difference  $\alpha_{\text{abs}}(440/870) - \alpha_{\text{abs}}(470/950)$  and  $\alpha_{\text{abs}}(440/870)$  there are shown the average  $\pm$  standard deviation, minima and maxima and selected percentiles.

| $X = \alpha_{\text{abs}}(470/950)$ , $Y = \alpha_{\text{abs}}(440/870)$ |                                   |                     |       |                    |        |        |        |             |        |        |       |
|-------------------------------------------------------------------------|-----------------------------------|---------------------|-------|--------------------|--------|--------|--------|-------------|--------|--------|-------|
| $\sigma_g$                                                              | linear regression, $Y = kX + Y_0$ |                     |       | Difference $Y - X$ |        |        |        | percentiles |        |        |       |
|                                                                         | $k \pm se$                        | $Y_0 \pm se$        | $R^2$ | ave $\pm$ std      | min    | 5      | 25     | 50          | 75     | 95     | max   |
| 1.4                                                                     | $1.009 \pm 0.0009$                | $-0.053 \pm 0.0007$ | 0.997 | $-0.047 \pm 0.028$ | -0.099 | -0.082 | -0.070 | -0.052      | -0.031 | 0.013  | 0.042 |
| 1.6                                                                     | $0.993 \pm 0.0006$                | $-0.038 \pm 0.0004$ | 0.998 | $-0.041 \pm 0.018$ | -0.073 | -0.065 | -0.056 | -0.043      | -0.029 | -0.012 | 0.035 |
| 1.8                                                                     | $0.978 \pm 0.0004$                | $-0.027 \pm 0.0002$ | 0.999 | $-0.034 \pm 0.013$ | -0.059 | -0.053 | -0.046 | -0.035      | -0.024 | -0.011 | 0.013 |
